# Supplementary material for: Protective Effects of Intestinal Gallic Acid in Neonatal Dairy Calves Against Extended-Spectrum β-lactamase Producing Enteroaggregative Escherichia coli Infection: Modulating Intestinal Homeostasis and Colitis
Source: Front Nutr. 2022 Mar 24;9:864080. doi: 10.3389/fnut.2022.864080 (PMC8988045; doi:10.3389/fnut.2022.864080)
Supplement: Supplementary Table 1 — Genomic analysis of DEC bacterial strain. [file Table_1.XLSX]

## Sheet: Sheet1
Table 1 Genomic analysis of DEC bacterial strain.
Isolate	1587
Collection year	2020
Country	China
Source	Dairy calf
Serotype	O101:H9
Antimicrobial resistant gene	blaCTX-M-15,blaTEM-1B, floR,dfrA17, aac(3)-IId,aph(6)-Id,aadA5,aph(3”)-Id,Isa(A), mdf(A), mph(A), tet(M), tet(A), sul2
Virulence gene	ElrA, hylA, cylM, cCF10, agg, tpx, cad, hra, papA_F11, mcmA, terC, afaB, papA_F19, astA, cib, fimH54
Plasmid	repUS43, IncHI2, Col440I
