# Supplementary material for: Protective Effects of Intestinal Gallic Acid in Neonatal Dairy Calves Against Extended-Spectrum β-lactamase Producing Enteroaggregative Escherichia coli Infection: Modulating Intestinal Homeostasis and Colitis
Source: Front Nutr. 2022 Mar 24;9:864080. doi: 10.3389/fnut.2022.864080 (PMC8988045; doi:10.3389/fnut.2022.864080)
Supplement: Supplementary Table 2 — Sampling information of calves used in the current study. [file Table_2.XLSX]

## Sheet: Sheet1
Table 2 Sampling information of calves used in the current study.
Calf ID	Phase1	Age of sample collection(day)	Age of first diarrea case (day)	E. coli 15872	Rotavirus3	Coronavirus3	Cryptosporidium3
D0479_1	D_1	7	6	＋	-	-	-
D0486_1	D_1	7	6	＋	-	-	-
D0469_1	D_1	5	4	＋	-	-	-
D0495_1	D_1	6	5	＋	-	-	-
D0444_1	D_1	7	6	＋	-	-	-
D0456_1	D_1	6	5	＋	-	-	-
D0505_1	D_1	5	4	＋	-	-	-
D2236_1	D_1	6	5	＋	-	-	-
D2248_1	D_1	6	5	＋	-	-	-
D2259_1	D_1	7	6	＋	-	-	-
D2231_1	D_1	6	5	＋	-	-	-
D2254_1	D_2	8	7	＋	-	-	-
D0476_1	D_2	8	7	＋	-	-	-
D0441_1	D_2	8	7	＋	-	-	-
D0434_1	D_2	8	7	＋	-	-	-
D0514_1	D_2	8	7	＋	-	-	-
D2253_2	D_2	9	8	＋	-	-	-
D2260_2	D_2	8	7	＋	-	-	-
D2242_2	D_2	8	7	＋	-	-	-
D2234_2	D_2	8	7	＋	-	-	-
H2291_1	H_1	5	/	-	-	-	-
H2282_2	H_1	5	/	-	-	-	-
H2294_1	H_1	5	/	-	-	-	-
H2292_1	H_1	5	/	-	-	-	-
H0473_1	H_1	5	/	-	-	-	-
H0435_1	H_1	6	/	-	-	-	-
H0457_4	H_1	5	/	-	-	-	-
H0044_1	H_1	5	/	-	-	-	-
H0451_4	H_1	6	/	-	-	-	-
H2283_1	H_1	6	/	-	-	-	-
H2294	H_2	9	/	-	-	-	-
H0468_1	H_2	10	/	-	-	-	-
H0500_1	H_2	10	/	-	-	-	-
H0496_1	H_2	11	/	-	-	-	-
H0450_1	H_2	11	/	-	-	-	-
H0451_1	H_2	11	/	-	-	-	-
H2293	H_2	12	/	-	-	-	-
H2282	H_2	14	/	-	-	-	-
H2298_2	H_2	8	/	-	-	-	-
H2306_2	H_2	8	/	-	-	-	-
1Calves were separated to 2-7 d (phase Ⅰ, H_1 and D_1) and 8-14 d (phase Ⅱ , H_2 and D_2); 2ESBL-EAEC isolate 1587 was isolated and detected using method as reference: He, Z.; Yang, S.; Ma, Y.; Zhang, S.; Cao, Z. Detection of CTX-M-15 Extended-Spectrum β-Lactamases Producing Escherichia coli Isolates from Colostrum and Faeces of Newborn Dairy Calves in China. Pathogens.2021;10,(1162). https://doi…
